# Supplementary material for: Classification of femur fracture in pelvic X-ray images using meta-learned deep neural network
Source: PubMed Central journal article supplement (PMC7426947; doi:10.1038/s41598-020-70660-4), 2020-08-13
Supplement: 41598_2020_70660_MOESM1_ESM.pdf [file 41598_2020_70660_MOESM1_ESM.pdf]

# **Classification of Femur Fracture in Pelvic X-ray Images Using Meta-learned Deep Neural Network**

Changhwan Lee<sup>1</sup>, Jongseong Jang<sup>2</sup>, Seunghun Lee<sup>3</sup>, Young Soo Kim<sup>4</sup>,  
Hang Joon Jo<sup>5</sup>, Yeesuk Kim<sup>6</sup>

<sup>1</sup> *Department of Biomedical Engineering, Hanyang University, Seoul, Korea*

<sup>2</sup> *LG Sciencepark, Seoul, Korea*

<sup>3</sup> *Department of Radiology, College of Medicine, Hanyang University, Seoul, Korea*

<sup>4</sup> *Institute of Innovative Surgical Technology, Hanyang University, Seoul, Korea*

<sup>5</sup> *Department of Physiology, College of Medicine, Hanyang University, Seoul, Korea*

<sup>6</sup> *Department of Orthopedic Surgery, College of Medicine, Hanyang University, Seoul, Korea*

**Address correspondence to: Yeesuk Kim, MD, Ph.D.**

**Address: Department of Orthopedic Surgery, Hanyang University 222  
Wangsimni-ro, Seongdong-gu, Seoul, South Korea, 133-791**

**E-mail: [estone96@gmail.com](mailto:estone96@gmail.com)**

**Telephone: +82-10-7371-7372**

# Supplementary Information

## Table of Contents

|                                                                                                                                                                                  |   |
|----------------------------------------------------------------------------------------------------------------------------------------------------------------------------------|---|
| Supplementary Fig. 1: Example proximal femur fracture images with AO/OTA classification standards .....                                                                          | 3 |
| Supplementary Fig. 2: ROC curves for (a) base model, (b) M1, and (c) M2 for multilabel classification of the test dataset.....                                                   | 4 |
| Supplementary Fig. 3: Overlapping results of confusion matrix obtained with five-fold cross validation for the dataset of 459 paired X-ray images and the radiology reports..... | 4 |
| Supplementary Table. 1: The average accuracy and F1-score obtained with five-fold cross validation for the dataset of 459 paired X-ray images and the radiology reports.....     | 5 |
| Supplementary Fig. 4: t-SNE visualization of each latent representation vector for (a) Base network, (b) M1, and (c) M2. N=Normal .....                                          | 5 |
| Supplementary Method: Focal loss for multi-class classification. ....                                                                                                            | 6 |

### Group A – trochanteric region fracture

- A1- simple pertrochanteric fracture

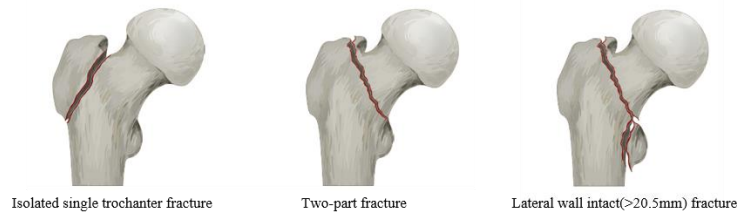

- A2- multifragmentary pertrochanteric, lateral wall incompetent ( $\leq 20.5\text{mm}$ ) fracture

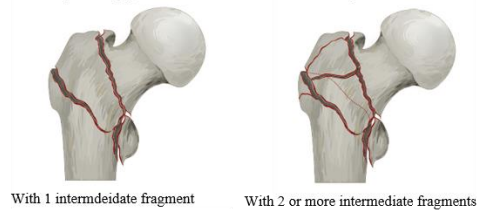

- A3- intertrochanteric (reverse obliquity) fracture

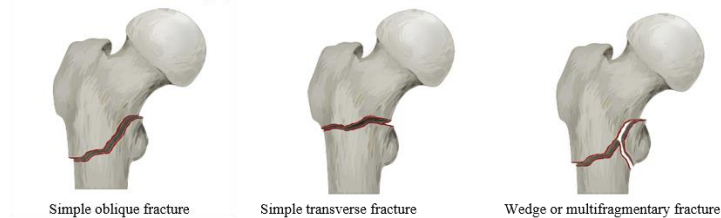

### Group B – femoral neck fracture

- B1- subcapital fracture

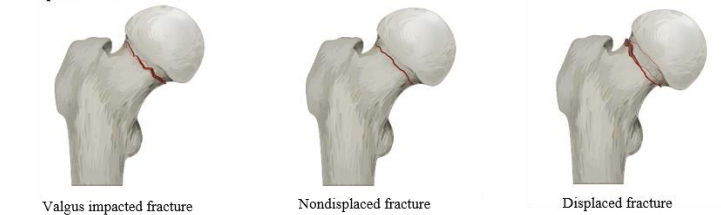

- B2- transcervical fracture

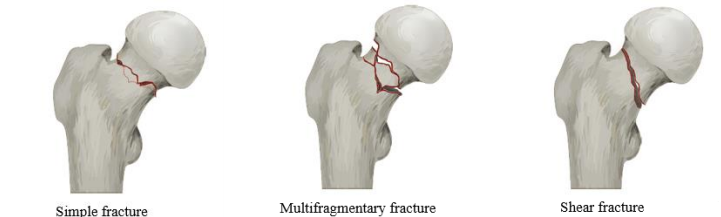

- B3- basicervical fracture

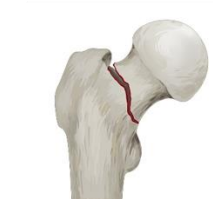

**Supplementary Fig. 1 | Example proximal femur fracture images with AO/OTA classification standards.** A1: Simple pertrochanteric fracture, A2: Multifragmentary pertrochanteric fracture, A3: Intertrochanteric (reverse obliquity) fracture, B1: Subcapital femoral neck fracture, B2: Transcervical femoral neck fracture, B3: Basicervical femoral neck fracture.

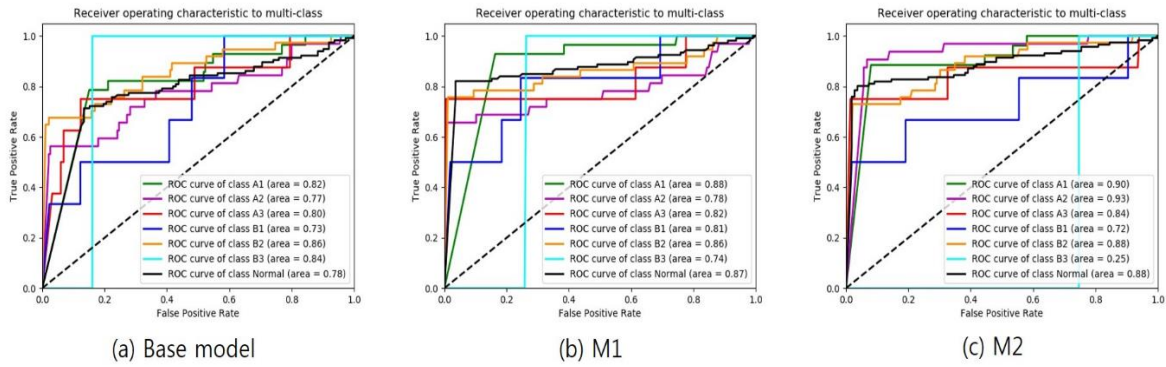

Supplementary Fig 2. | ROC curves for (a) base model, (b) M1, and (c) M2 for multilabel classification of the test dataset.

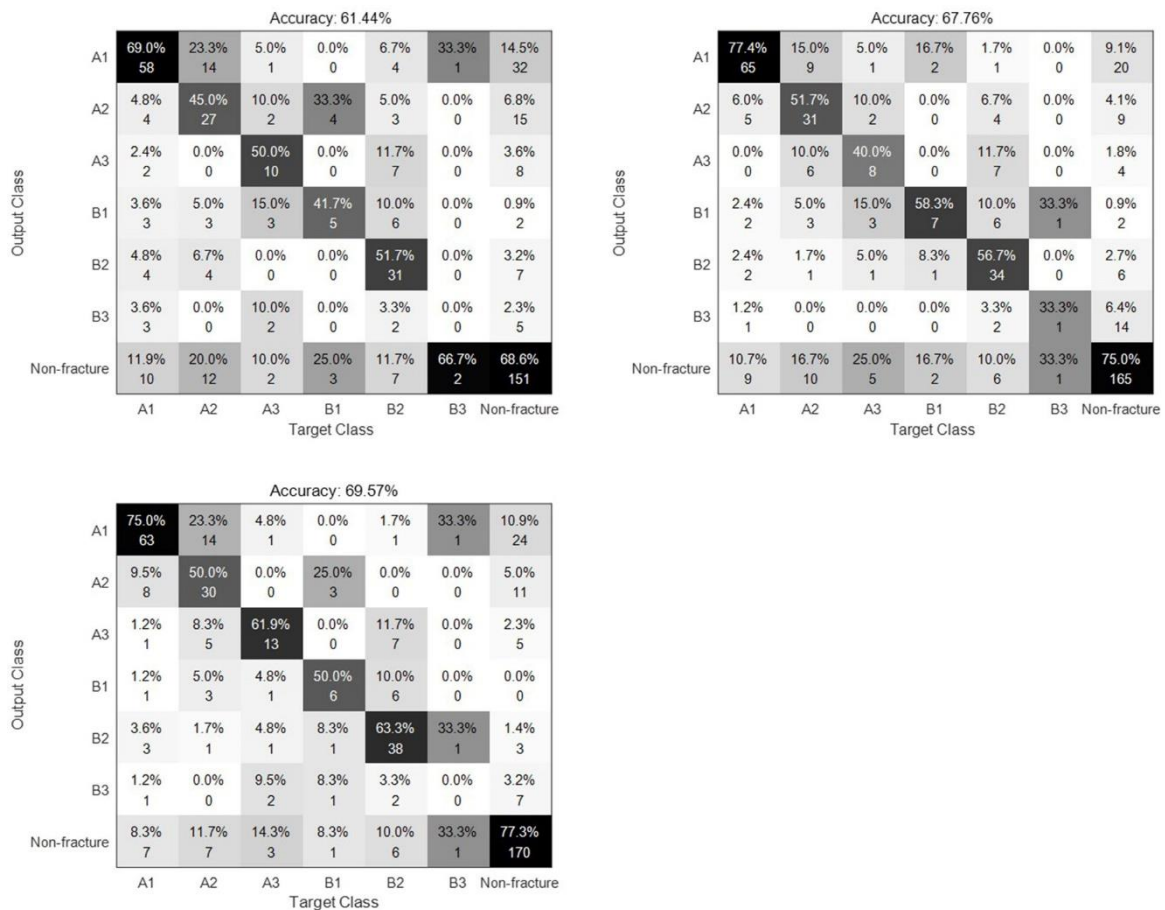

Supplementary Figure 3 | Overlapping results of confusion matrix obtained with five-fold cross validation for the dataset of 459 paired X-ray images and the radiology reports.

| Model                          | Measure                  | 2 Class       | 3 Class       | 7 Class       |
|--------------------------------|--------------------------|---------------|---------------|---------------|
| Base Network<br>(Inception V3) | Avg. Overall Accuracy(%) | 76.12 ± 2.04  | 67.18 ± 1.43  | 62.24 ± 1.75  |
|                                | Avg. F1 score            | 0.768 ± 0.021 | 0.658 ± 0.016 | 0.451 ± 0.010 |
| M1                             | Avg. Overall Accuracy    | 81.75 ± 2.19  | 73.85 ± 1.76  | 67.76 ± 1.68  |
|                                | Avg. F1 score            | 0.805 ± 0.022 | 0.728 ± 0.013 | 0.487 ± 0.017 |
| M2                             | Avg. Overall Accuracy    | 82.58 ± 2.67  | 76.73 ± 1.40  | 69.57 ± 1.37  |
|                                | Avg. F1 score            | 0.838 ± 0.025 | 0.767 ± 0.016 | 0.492 ± 0.014 |

**Supplementary Table. 1 | The average overall accuracy and F1-score obtained with five-fold cross validation for the dataset of 459 paired X-ray images and the radiology reports.**

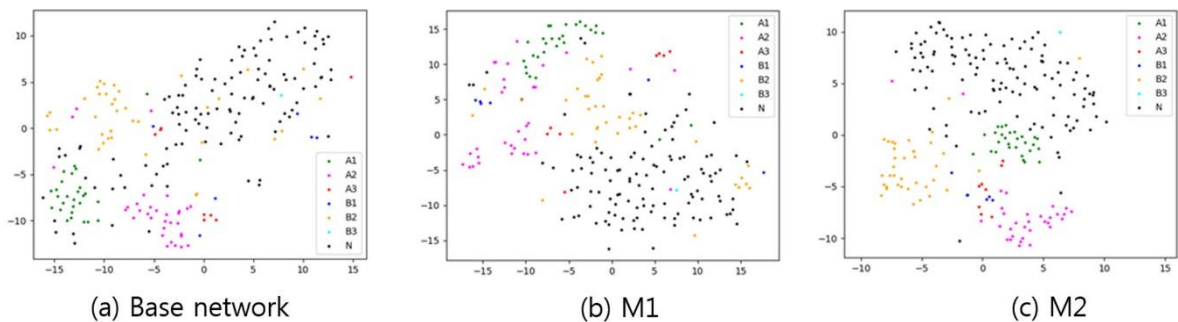

**Supplementary Fig. 4 | t-SNE visualization of each latent representation vector for (a) Base network, (b) M1, and (c) M2. N=Normal.**

## Focal loss for multi-class classification

The original focal loss [21] was designed to address the class imbalance for binary classification, but it can be extended to the multi-class classification tasks. The Cross Entropy (CE) loss for an example is given in equation (1):

$$L_{CE} = -\sum_{i=1}^C t_i \log(y_i) \quad (1)$$

where  $C$  denotes the number of categories,  $t_i$  denotes a real probability distribution,  $y_i$  denotes a probability distribution of the prediction.  $t_i = 1$  if  $i$  belongs to the true label, else it is 0.

The multi-class focal loss can be designed to address the class imbalance via down-weighting easy examples such that their contribution to the total loss is small even if their number is large. In other words, it focuses training on minority examples. A method for addressing class imbalance is to add a modulating factor  $(1 - y_i)^\gamma$  to the cross entropy loss, with adjustable focusing parameter  $\gamma \geq 0$ . We define the multi-class focal loss, as formulated in equation (2):

$$L_{fl} = -\sum_{i=1}^C (1 - y_i)^\gamma t_i \log(y_i) \quad (2)$$

The focusing parameter  $\gamma$  is utilized to control the rate at which easy examples are down-weighted. Especially, when  $\gamma = 0$ ,  $L_{fl}$  is equivalent to  $L_{CE}$ . The effect of the modulating factor  $(1 - y_i)^\gamma$  is increased with  $\gamma$ . Secondly, when an example is misclassified and  $y_i$  is small, the modulating factor nearly tends to 1, and thus the loss is unaffected. As  $y_i$  increases to 1, the modulating factor nearly tends to 0 and the loss for well-classified examples is down-weighted. We adopt the multi-class focal loss in our experiments with  $\gamma = 1.5$ , which is determined empirically.
